# Supplementary material for: Effect of Marriage on Risk for Onset of Alcohol Use Disorder: A Longitudinal and Co-Relative Analysis in a Swedish National Sample
Source: Atypon-hosted journal article supplement (doi:10.1176/appi.ajp.2016.15111373), 2016-05-16
Supplement: appi.ajp.2016.15111373.ds001.pdf [file appi.ajp.2016.15111373.ds001.pdf]

Data Supplement for Kendler et al., Effect of Marriage on Risk for Onset of Alcohol Use Disorder: A Longitudinal and Co-Relative Analysis in a Swedish National Sample. Am J Psychiatry (doi: 10.1176/appi.ajp.2016.15111373)

**TABLE S1. Men -- Descriptive Statistics for the Co-Relative Analyses**

|                                      | MZ Twins      |              | Full Siblings   |               | Half-Siblings  |               | Cousins           |                |
|--------------------------------------|---------------|--------------|-----------------|---------------|----------------|---------------|-------------------|----------------|
|                                      | All pairs     | Informative  | All pairs       | Informative   | All pairs      | Informative   | All pairs         | Informative    |
| Number of individuals/unique pairs   | 5,230/2,615   | 100/50       | 448,488/224,244 | 14,500/7,250  | 33,534/16,767  | 3,038/1,519   | 1,211,752/605,876 | 43,698/21,849  |
| Birth year, mean (SD)                | 1973.8 (8.9)  | 1969.4 (6.1) | 1975.0 (8.6)    | 1968.7 (6.3)  | 1972.4 (8.7)   | 1968.0 (6.0)  | 1975.6 (8.3)      | 1969.6 (5.9)   |
| Age at first registration, mean (SD) | 28.7 (7.4)    | 30.1 (7.5)   | 29.2 (8.5)      | 29.6 (8.3)    | 28.9 (8.4)     | 28.8 (8.1)    | 28.6 (8.1)        | 28.7 (7.9)     |
| Early onset externalizing disorders  | 340 (6.5%)    | 15 (15.0%)   | 36,917 (8.2%)   | 3,736 (25.7%) | 6,085 (18.1%)  | 987 (32.5%)   | 96,165 (7.9%)     | 9,440 (21.6%)  |
| Marriage before onset or censoring   | 2,695 (51.5%) | 57 (57.0%)   | 204,713 (45.6%) | 8,392 (57.8%) | 16,759 (50.0%) | 1,709 (56.3%) | 565,272 (46.6%)   | 25,056 (57.3%) |
| AUD onset                            | 127 (2.4%)    | 54 (54.0%)   | 14,215 (3.2%)   | 7,453 (51.4%) | 2,765 (8.2%)   | 1,560 (50.4%) | 38,972 (3.2%)     | 22,139 (50.7%) |

**TABLE S2. Women -- Descriptive Statistics for the Co-Relative Analyses**

|                                            | MZ Twins      |              | Full Siblings   |               | Half-Siblings  |              | Cousins           |               |
|--------------------------------------------|---------------|--------------|-----------------|---------------|----------------|--------------|-------------------|---------------|
|                                            | All pairs     | Informative  | All pairs       | Informative   | All pairs      | Informative  | All pairs         | Informative   |
| Number of individuals/<br>unique pairs     | 6,312/3,156   | 52/26        | 400,476/200,238 | 4,776/2,388   | 30,976/15,488  | 974/487      | 1,083,018/541,509 | 13,198/6,599  |
| Birth year, mean<br>(SD)                   | 1973.6 (7.5)  | 1970.1 (6.9) | 1975.0 (8.8)    | 1970.4 (8.7)  | 1972.5 (8.7)   | 1970.0 (7.6) | 1975.6 (8.3)      | 1971.4 (7.0)  |
| Age at first<br>registration, mean<br>(SD) | 26.5 (7.6)    | 27.8 (8.7)   | 29.9 (9.2)      | 29.5 (8.7)    | 31.0 (9.2)     | 30.0 (9.1)   | 29.2 (8.7)        | 28.7 (8.3)    |
| Early onset<br>externalizing<br>disorders  | 129 (2.0%)    | 4 (7.7%)     | 11,797 (2.9%)   | 340 (7.1%)    | 1,849 (6.0%)   | 104 (10.7%)  | 32,569 (3.0%)     | 971 (7.4%)    |
| Marriage before<br>onset or<br>censoring   | 3,676 (58.2%) | 29 (55.8%)   | 216,681 (54.1%) | 2,853 (59.7%) | 18,362 (59.3%) | 562 (57.7%)  | 603,953 (55.8%)   | 7,733 (58.6%) |
| AUD onset                                  | 59 (0.9%)     | 27 (51.9%)   | 4,482 (1.1%)    | 2,413 (50.5%) | 781 (2.5%)     | 491 (50.4%)  | 11,783 (1.1%)     | 6,622 (50.2%) |
