# Supplementary material for: Effect of Marriage on Risk for Onset of Alcohol Use Disorder: A Longitudinal and Co-Relative Analysis in a Swedish National Sample
Source: Atypon-hosted journal article supplement (doi:10.1176/appi.ajp.2016.15111373), 2016-05-16
Supplement: appi.ajp.2016.15111373.ds001.pdf [file appi.ajp.2016.15111373.ds001.pdf]

 


Psychiatry Online
